# Supplementary material for: A novel yet simple strategy to fabricate visible light responsive C,N-TiO2/g-C3N4 heterostructures with significantly enhanced photocatalytic hydrogen generation
Source: Royal Society of Chemistry journal article supplement (doi:10.1039/c5ra18302b), 2015-01-01
Supplement: c5ra18302b1.pdf [file c5ra18302b1.pdf]

## Supplementary Information

### **Novel yet simple strategy to fabricate visible light responsive C,N-TiO<sub>2</sub>/g-C<sub>3</sub>N<sub>4</sub> heterostructures with significantly enhanced photocatalytic hydrogen generation**

Wei Chen<sup>a</sup>, Tian-Yu Liu<sup>a</sup>, Ting Huang<sup>a</sup>, Xiao-Heng Liu<sup>a,\*</sup>, Guo-Rong  
Duan<sup>a</sup>, Xu-Jie Yang<sup>a</sup> and Shen-Ming Chen<sup>b,\*</sup>

<sup>a</sup>*Key Laboratory of Education Ministry for Soft Chemistry and Functional  
Materials, Nanjing University of Science and Technology, Nanjing  
210094, China*

<sup>b</sup>*Electroanalysis and Bioelectrochemistry Lab, Department of Chemical  
Engineering and Biotechnology, National Taipei University of Technology,  
No.1, Section 3, Chung-Hsiao East Road, Taipei 106, Taiwan (ROC).*

Corresponding author.

E-mail: xhliu@mail.njust.edu.cn (X.H. Liu)

smchen78@ms15.hinet.net(S.M. Chen;)

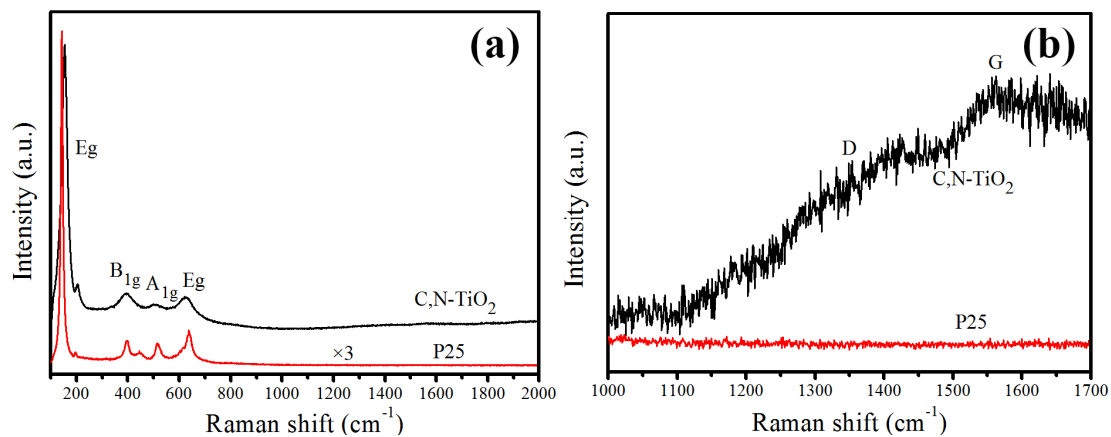

**Figure S1.** (a) Raman profiles of the C<sub>3</sub>N-TiO<sub>2</sub> NPs sample and P25 sample, (b) D and G bands in the higher frequency region.

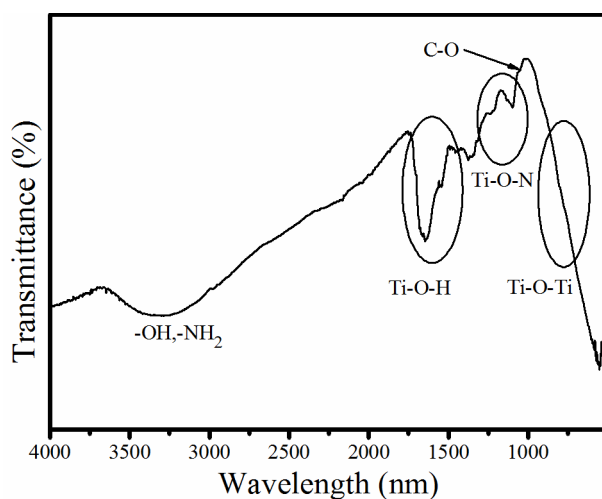

**Figure S2.** Typical FT-IR spectra of C<sub>3</sub>N-TiO<sub>2</sub> NPs sample.

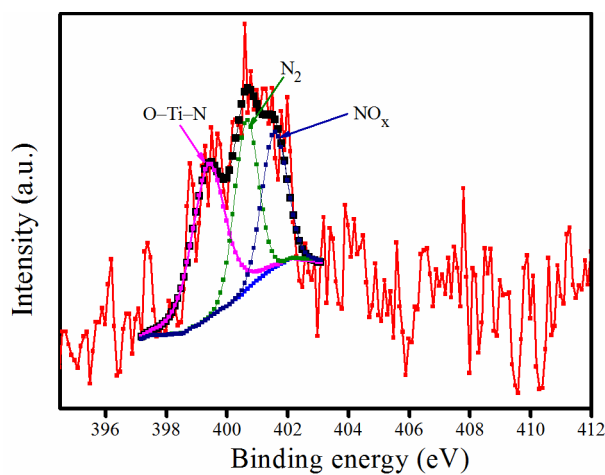

**Figure S3.** XPS spectra of C<sub>3</sub>N-TiO<sub>2</sub> NPs at the N 1s region.

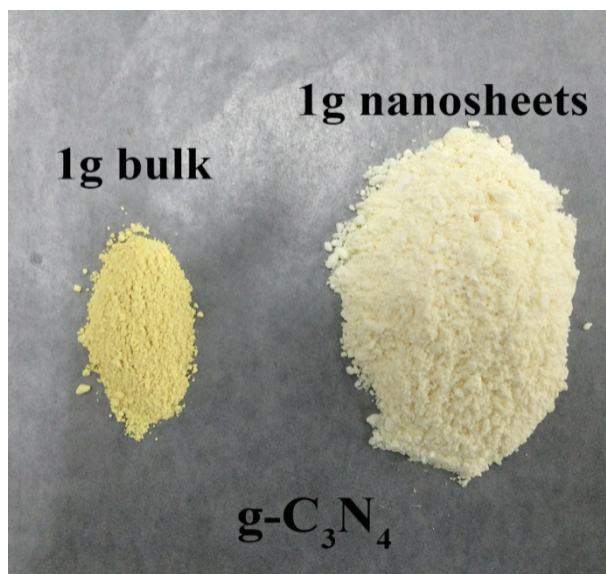

**Figure S4.** Digital photograph of bulk  $g\text{-C}_3\text{N}_4$  and porous  $g\text{-C}_3\text{N}_4$  ultrathin NSs.

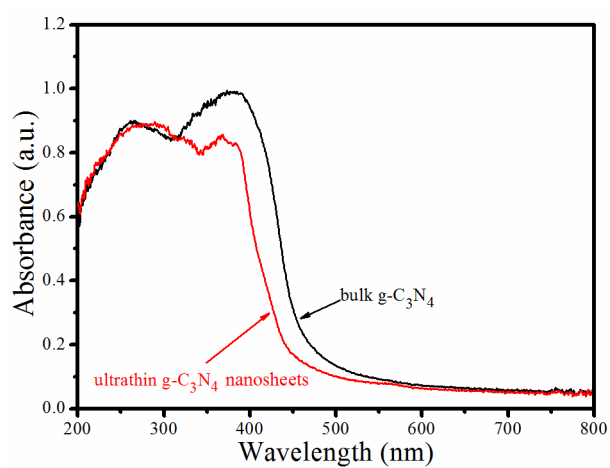

**Figure S5.** UV-vis diffuse reflectance spectra of bulk  $g\text{-C}_3\text{N}_4$  and ultrathin  $g\text{-C}_3\text{N}_4$  NSs.

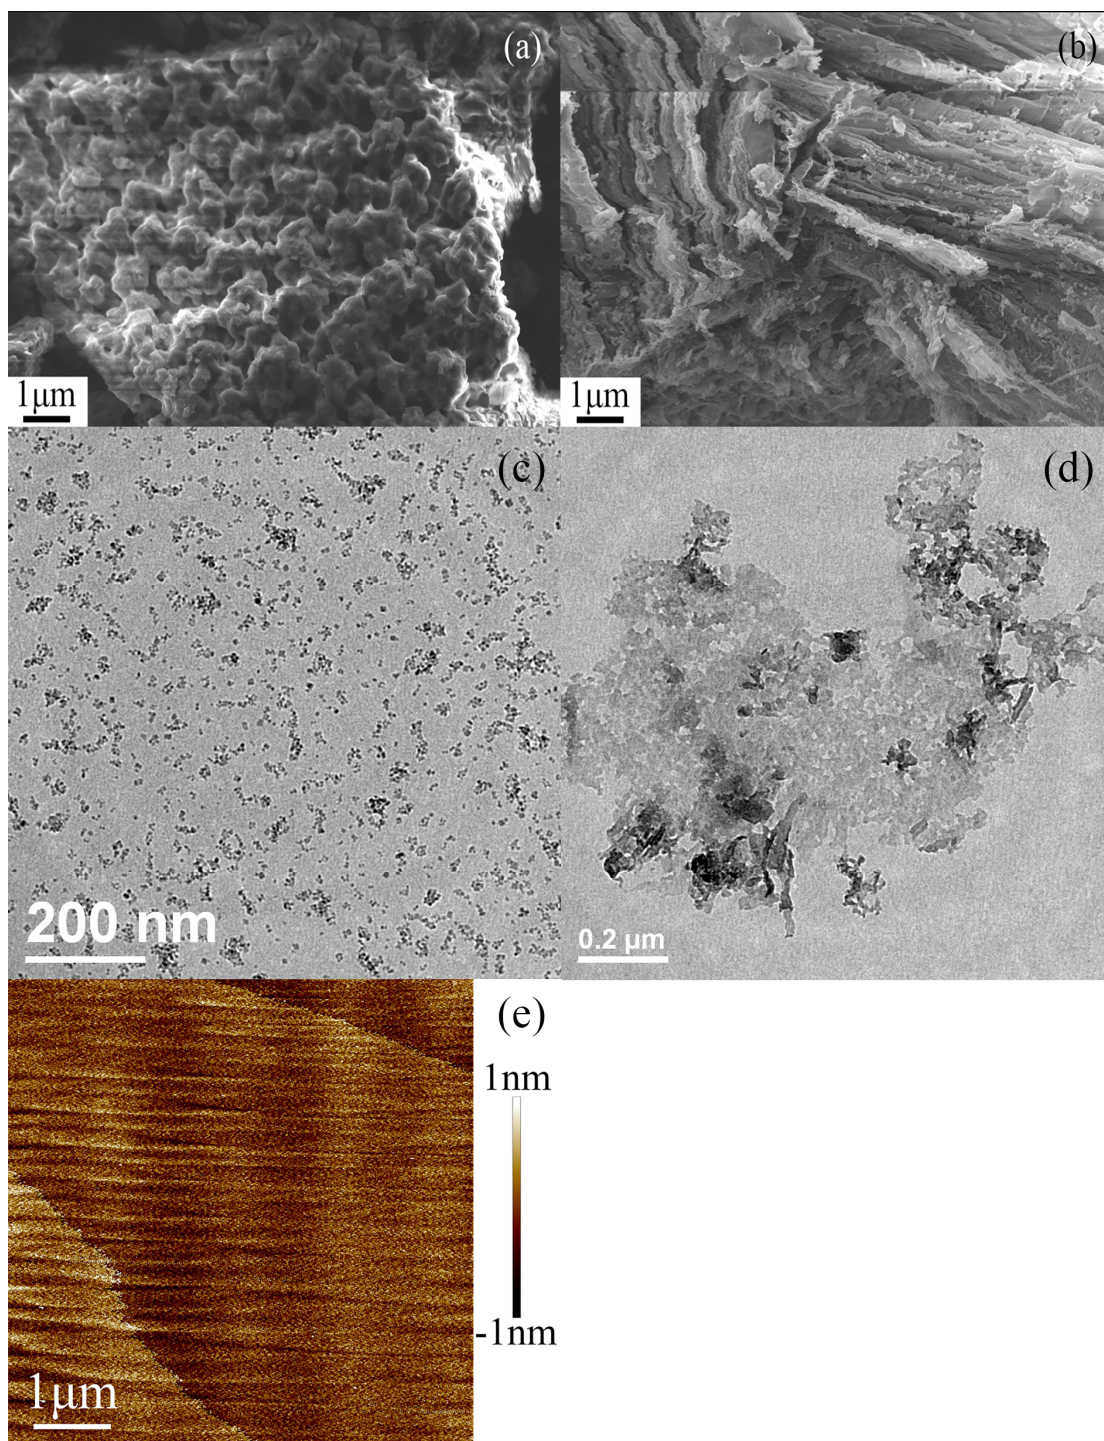

**Figure S6.** Typical FE-SEM images of (a) bulk  $\text{g-C}_3\text{N}_4$ , (b) ultrathin  $\text{g-C}_3\text{N}_4$  NSs, TEM images of (c)  $\text{C,N-TiO}_2$  NPs and (d)  $\text{g-C}_3\text{N}_4$  NSs, and (e) AFM of  $\text{g-C}_3\text{N}_4$  NSs.

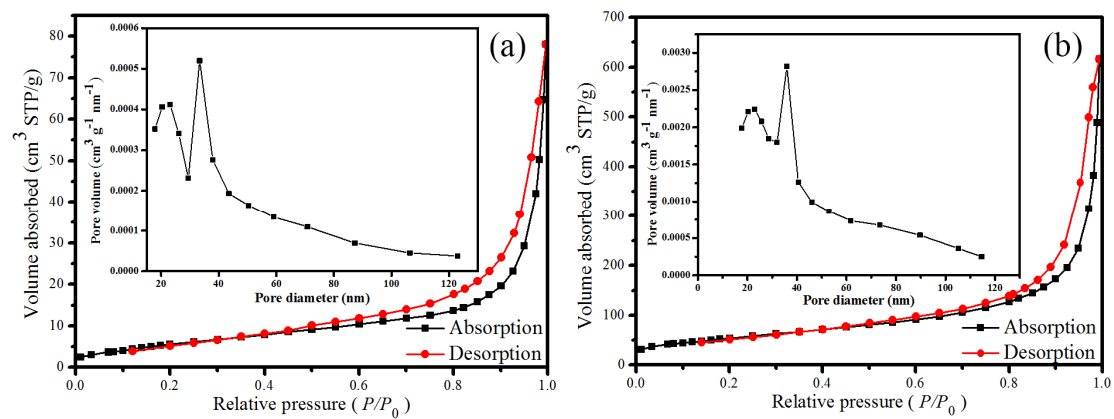

**Figure S7.** N<sub>2</sub> adsorption-desorption isotherms and pore size distribution curves (inset) of (a) bulk g-C<sub>3</sub>N<sub>4</sub> and (b) ultrathin g-C<sub>3</sub>N<sub>4</sub> NSs.
